# Supplementary material
Source: HighWire-hosted journal article supplement (https://qdcxjkg.com/highwire/filestream/114495/field_highwire_adjunct_files/0/Table_S1.pdf)
Supplement: Table_S1.pdf [file Table_S1.pdf]

**Table S1:** For each Immunomarker; the mode of antigen retrieval and concentrations of primary and secondary antibody including respective manufacturers for each is shown.

| <b>Marker</b> | <b>Antigen retrieval</b>                    | <b>Primary Antibody</b>                                | <b>Secondary Antibody</b>                           |
|---------------|---------------------------------------------|--------------------------------------------------------|-----------------------------------------------------|
| αSMA          | 10mM sodium citrate buffer(Sigma Dorset UK) | ab7817,clone 1A4, 0.2mg/ml(Abcam)                      | Biotinylated horse anti-mouse,7.5µg/ml (Vector)     |
| αvβ6          | Pepsin( Digest-All, Invitrogen)             | BiogenIdec, 0.3µl/ml                                   | Biotinylated horse anti-mouse7.5µg/ml (Vector)      |
| Tenascin C    | 10mM sodium citrate buffer(Sigma Dorset UK) | Mouse monoclonal 12µl/ml (Novocastra)                  | Biotinylated horse anti-mouse, 7.5µg/ml (Vector)    |
| HGF           | 10mM sodium citrate buffer(Sigma Dorset UK) | Mouse anti-c-Met , 5µl/ml (Invitrogen, cat no 37-0100) | Biotinylated goat anti mouse IgG, 7.5µg/ml (Vector) |
| SPC           | 10mM sodium citrate buffer(Sigma Dorset UK) | Rabbit IgG, 1.25µg/ml (Millipore NG1850802)            | Biotinylated goat anti-rabbit, 7.5µg/ml (Vector)    |
